# Supplementary material for: Combined Effects of Weather and Health Shocks on Consumption in Rural Uganda
Source: Research Square preprint supplement (doi:10.21203/rs.3.rs-5820565/v1), 2025-01-20
Supplement: Supplementary file 1 [file 4e666dbfa1703b420b3580d7.docx]

**Combined Effects of Weather and Health Shocks on Consumption in Rural Uganda**

**Supplementary materials**

**Table S1. Descriptive statistics**

| **Variables** | **Wave 1** (N=621) | **Wave 2**  (N=621) | **Wave 3**  (N=621) | **Wave 4**  (N=621) | **Wave 5**  (N=621) | **Wave 6**  (N=621) | **All waves**  (N =3726)) |
| --- | --- | --- | --- | --- | --- | --- | --- |
| Month of survey | **June-July** | **Aug-Sept** | **Dec** | **March** | **May** | **August** | **June to Aug.** |
| Year of survey | **2020** | **2020** | **2020** | **2021** | **2021** | **2021** | **2020/21** |
| Household size | 6.626  (2.404) | 6.858  (2.535) | 7.016 (2.615) | 6.824  (2.627) | 6.729  (2.618) | 6.594  (2.629) | 6.775  (2.575) |
| Adult equivalent | 3.215  (1.010) | 3.277  (1.066) | 3.230  (1.061) | 3.215  (1.055) | 3.166  (1.046) | 3.151  (1.040) | 3.209  (1.047) |
| Droughts/heat waves  (1 =Yes)- subjective | 0.043  (0.204) | 0.019  (0.137) | 0.032 (0.176) | 0.024  (0.153) | 0.006  (0.080) | 0.502  (0.500) | 0.105  (0.306) |
| Floods (1 =Yes) - subjective | 0.006  (0.080) | 0.069  (0.254) | 0.040 (0.196) | 0.009  (0.098) | 0.009  (0.098) | 0.002  (0.040) | 0.023  (0.149) |
| Rainfall Z scores (2 months) | -0.153 (0.715) | 0.741  (1.915) | 0.969 (1.560) | 0.358  (1.389) | -0.319  (1.336) | -0.652  (0.845) | 0.157  (1.474) |
| Extreme rainfall  (1 =Yes) - objective | 0.116  (0.320) | 0.441  (0.497) | 0.333 (0.472) | 0.359  (0.480) | 0.235  (0.424) | 0 | 0.247  (0.432) |
| Temperature Z scores (2 months) | -0.226 (0.795) | -0.394  (0.838) | -0.398 (0.816) | -0.343 (0.997) | -0.145  (1.049) | 0.129  (1.095) | -0.229  (0.957) |
| Extreme temperature (1 =Yes) - objective | 0.016  (0.126) | 0.008  (0.089) | 0.034 (0.181) | 0.122  (0.328) | 0.182  (0.386) | 0.238  (0.426) | 0.100  (0.300) |
| HHs member sick (1 =Yes) | 0.712  (0.453) | 0.816  (0.387) | 0.763 (0.425) | 0.717  (0.451) | 0.683  (0.466) | 0.617  (0.487) | 0.718  (0.450) |
| HH member sick more than 30 days (1 =Yes) | 0.098  (0.298) | 0.113  (0.317) | 0.114 (0.318) | 0.092  (0.289) | 0.063  (0.243) | 0.047  (0.211) | 0.088  (0.283) |
| Household member sick & admitted (1 =Yes) | 0.130  (0.337) | 0.198  (0.399) | 0.193 (0.395) | 0.148  (0.355) | 0.111  (0.315) | 0.103  (0.304) | 0.147  (0.354) |
| Total health expenditures (UGX) | 49,082 (171,233) | 51,278 (122,826) | 46,429 (102,827) | 39,469 (104,598) | 34,162 (102,683) | 39,575 (124,968) | 43, 332  (123,947) |
| Paid labour force participation (1 =Yes) | 0.614  (0.487) | 0.634  (0.482) | 0.520 (0.499) | 0.554  (0.497) | 0.649  (0.478) | 0.551  (0.498) | 0.587  (0.492) |
| Wage income (UGX) | 208,565 (554,384) | 248,079 (615,989) | 224,714 (692,471) | 265,132 (616,450) | 252, 203 (582,996) | 206,467  (498,814) | 234,193  (596,537) |
| HHs total family labour (pers days) | 33.659 (53.659) | 17.429 (26.991) | 40.190 (67.356) | 20.507 (29.709) | 57.005 (70.703) | 19.318 (40.334) | 31.352  (52.962) |
| Food consumption per adult equivalent (UGX) – 2month | 174,430 (126,596) | 166,998 (115,339) | 157,768 (95,329) | 157,581 (111,789) | 144,339 (103,777) | 145,857 (126,830) | 157,829 (114,274) |
| Household diet diversity | 7.142  (1.979) | 7.375  (2.073) | 7.192 (2.088) | 7.320 (2.261) | 6.936 (2.148) | 6.886  (2.179) | 7.142  (2.129) |
| Non-food consumption- per adult equivalent | 39,610 (53,072) | 69,307 (160,640) | 79,041 (128,749) | 83,764 (168,596) | 90,125 (189,838) | 59,313 (126,159) | 70,193  (145,558) |
| Total consumption value (food & nonfood) | 214, 039 (150,070) | 236,305 (228,112) | 236,808 (177,577) | 241,345 (222,231) | 234,464 (230,179) | 205,169 (194,780) | 228,022 (202,957) |
| Health or wellbeing group (1 =Yes) | 0.069  (0.254) | 0.061  (0.239) | 0.167 (0.374) | 0.208  (0.406) | 0.227  (0.419) | 0.262  (0.440) | 0.166  (0.372) |
| Financial group (1 = Yes) | 0.434  (0.496) | 0.586  (0.493) | 0.543 (0.498) | 0.634  (0.482) | 0.604  (0.489) | 0.581  (0.494) | 0.564  (0.496) |
| Loan income (1 =Yes) | 0.024  (0.154) | 0.040  (0.197) | 0.043 (0.204) | 0.039  (0.193) | 0.035  (0.185) | 0.034  (0.181) | 0.036  (0.186) |
| Remittances | 0.069  (0.254) | 0.034  (0.181) | 0.045 (0.208) | 0.056  (0.231) | 0.066  (0.249) | 0.055  (0.228) | 0.054  (0.226) |
| Free medical services | 0.242  (0.428) | 0.293  (0.456) | 0.206 (0.405) | 0.211  (0.408) | 0.208  (0.406) | 0.153  (0.360) | 0.219  (0.413) |
| Asset value | 5,446,490 (11,081,973) | 5,381,064 (11,308,067) | 5,436,732 10,484,310 | 498,7221 8,665,275 | 5,025,970 9,010,774 | 5,724,159 11,223,223 | 5,333,606 10,347,101 |
| Asset ownership (1= Female) | 0.428  (0.495) | 0.457  (0.498) | 0.424 (0.495) | 0.443  (0.497) | 0.425  (0.495) | 0.380  (0.486) | 0.426  (0.495) |
| Livestock value | 1,709,576 (3,367,794) | 1,710,812 3,026,407 | 1,911,948 (4,553,025) | 1,739,105 (2,834,471) | 1,613,469 (2,356,208) | 1,624,909 (2,473,873) | 1,718,303 (3,186,252) |

Standard deviation in parentheses

**Table S2**: **Resilience assessment: Total consumption transition matrix (%)**

| Quintiles | Wave 1 & 6 | | | | | Quintiles | Wave 1 & 2 | | | | |
| --- | --- | --- | --- | --- | --- | --- | --- | --- | --- | --- | --- |
| Wave 6 | | | | | Wave 2 | | | | |
| Wave 1 | 1 | 2 | 3 | 4 | 5 | Wave 1 | 1 | 2 | 3 | 4 | 5 |
| 1 | 49 | 29 | 10 | 8 | 4 | 1 | 49 | 21 | 14 | 10 | 6 |
| 2 | 28 | 27 | 26 | 15 | 4 | 2 | 33 | 27 | 21 | 13 | 6 |
| 3 | 15 | 21 | 23 | 27 | 14 | 3 | 7 | 25 | 27 | 24 | 17 |
| 4 | 6 | 10 | 28 | 28 | 27 | 4 | 7 | 18 | 27 | 31 | 18 |
| 5 | 2 | 12 | 12 | 23 | 52 | 5 | 4 | 10 | 11 | 22 | 53 |
|  | Wave 2 & 3 | | | | |  | Wave 3 & 4 | | | | |
| Wave 2 | Wave 3 | | | | | Wave 3 | Wave 4 | | | | |
| 1 | 2 | 3 | 4 | 5 | 1 | 2 | 3 | 4 | 5 |
| 1 | 51 | 22 | 17 | 9 | 2 | 1 | 59 | 22 | 7 | 7 | 2 |
| 2 | 25 | 28 | 20 | 17 | 10 | 2 | 21 | 35 | 21 | 16 | 7 |
| 3 | 18 | 27 | 21 | 27 | 7 | 3 | 13 | 19 | 36 | 22 | 10 |
| 4 | 4 | 17 | 23 | 24 | 32 | 4 | 5 | 15 | 25 | 31 | 24 |
| 5 | 2 | 6 | 19 | 23 | 49 | 5 | 2 | 7 | 10 | 23 | 56 |
|  | Wave 4 & 5 | | | | |  | Wave 5 & 6 | | | | |
|  | Wave 5 | | | | |  | Wave 6 | | | | |
| Wave 4 | 1 | 2 | 3 | 4 | 5 | Wave 5 | 1 | 2 | 3 | 4 | 5 |
| 1 | 63 | 19 | 12 | 3 | 2 | 1 | 66 | 26 | 4 | 2 | 2 |
| 2 | 19 | 35 | 23 | 14 | 9 | 2 | 22 | 32 | 31 | 13 | 2 |
| 3 | 9 | 27 | 29 | 26 | 9 | 3 | 7 | 27 | 30 | 27 | 10 |
| 4 | 6 | 15 | 25 | 29 | 26 | 4 | 2 | 11 | 26 | 33 | 27 |
| 5 | 3 | 4 | 10 | 28 | 54 | 5 | 2 | 3 | 10 | 26 | 59 |

**Table S3**: **Effect of health, weather shocks and their interactions on consumption *(FE models without wave fixed effects)***

| VARIABLES | Total consumption | | Food consumption | | Non-food consumption | | HDDS | |
| --- | --- | --- | --- | --- | --- | --- | --- | --- |
|  | (1) | (2) | (3) | (4) | (5) | (6) | (7) | (8) |
| Sick more than 30 days (t) | 0.033 |  | 0.062 |  | -0.099 |  | 0.033** |  |
|  | (0.041) |  | (0.035) |  | (0.075) |  | (0.016) |  |
| Sick more than 30 days (t-1) | 0.017 |  | 0.006 |  | 0.062* |  | -0.003 |  |
|  | (0.025) |  | (0.021) |  | (0.026) |  | (0.013) |  |
| Hospitalized (t) |  | 0.069** |  | 0.070** |  | 0.049 |  | 0.017 |
|  |  | (0.023) |  | (0.023) |  | (0.044) |  | (0.012) |
| Hospitalized (t-1) |  | 0.030 |  | -0.006 |  | 0.097* |  | -0.016 |
|  |  | (0.018) |  | (0.019) |  | (0.043) |  | (0.011) |
| Rainfall z scores (t) | -0.024** | -0.027*** | -0.021 | -0.022** | -0.017 | -0.022 | -0.002 | -0.001 |
|  | (0.009) | (0.004) | (0.013) | (0.008) | (0.023) | (0.024) | (0.004) | (0.004) |
| Rainfall z scores (t-1) | -0.009 | -0.009 | -0.018 | -0.018 | 0.035* | 0.028 | 0.004 | 0.001 |
|  | (0.011) | (0.011) | (0.013) | (0.015) | (0.016) | (0.018) | (0.004) | (0.004) |
| Temperature z scores (t) | -0.195*** | -0.191*** | -0.154** | -0.153** | -0.234* | -0.227* | -0.019 | -0.018 |
|  | (0.031) | (0.031) | (0.048) | (0.047) | (0.101) | (0.099) | (0.013) | (0.013) |
| Temperature z scores (t-1) | -0.216*** | -0.211*** | -0.240** | -0.232** | -0.055 | -0.056 | -0.023 | -0.025* |
|  | (0.057) | (0.060) | (0.089) | (0.091) | (0.103) | (0.115) | (0.015) | (0.015) |
| Sick 30days# rainfall (t) | -0.033 |  | -0.024 |  | -0.038 |  | -0.010 |  |
|  | (0.032) |  | (0.025) |  | (0.054) |  | (0.011) |  |
| Sick 30days# temperature (t) | 0.017 |  | 0.036 |  | -0.130 |  | 0.008 |  |
|  | (0.061) |  | (0.056) |  | (0.093) |  | (0.021) |  |
| Sick 30days# rainfall (t-1) | -0.022 |  | -0.012 |  | -0.041 |  | -0.001 |  |
|  | (0.023) |  | (0.025) |  | (0.022) |  | (0.008) |  |
| Sick 30days# temperature (t-1) | -0.018 |  | 0.011 |  | -0.038 |  | -0.014 |  |
|  | (0.049) |  | (0.054) |  | (0.027) |  | (0.016) |  |
| Hospitalized #rainfall (t) |  | -0.006 |  | -0.013 |  | 0.019 |  | -0.006 |
|  |  | (0.034) |  | (0.026) |  | (0.064) |  | (0.009) |
| Hospitalized #temperature |  | 0.005 |  | 0.022 |  | -0.049 |  | -0.005 |
|  |  | (0.040) |  | (0.038) |  | (0.052) |  | (0.015) |
| Hospitalized #rainfall (t-1) |  | -0.005 |  | -0.008 |  | 0.011 |  | 0.016** |
|  |  | (0.010) |  | (0.013) |  | (0.036) |  | (0.008) |
| Hospitalized #temperature (t-1) |  | -0.016 |  | -0.032 |  | 0.024 |  | -0.003 |
|  |  | (0.031) |  | (0.027) |  | (0.094) |  | (0.018) |
| Household size | -0.043* | -0.043* | -0.054** | -0.053** | -0.028 | -0.030* | -0.001 | -0.000 |
|  | (0.020) | (0.020) | (0.016) | (0.016) | (0.018) | (0.016) | (0.004) | (0.004) |
| Assets value (log) | 0.077*** | 0.075*** | 0.047** | 0.046** | 0.117*** | 0.113** | 0.017*** | 0.017*** |
|  | (0.016) | (0.016) | (0.014) | (0.014) | (0.032) | (0.033) | (0.006) | (0.006) |
| Livestock value (log) | 0.007*** | 0.007*** | 0.009*** | 0.009*** | -0.000 | 0.000 | 0.003*** | 0.003*** |
|  | (0.002) | (0.002) | (0.002) | (0.002) | (0.005) | (0.005) | (0.001) | (0.001) |
| Gender of assets owner | 0.022 | 0.026 | 0.030 | 0.033 | -0.045* | -0.044 | 0.004 | 0.004 |
|  | (0.024) | (0.023) | (0.026) | (0.025) | (0.021) | (0.024) | (0.011) | (0.011) |
| Free medical services | 0.020 | 0.019 | 0.055* | 0.054* | -0.078 | -0.081 | 0.016 | 0.016 |
|  | (0.026) | (0.025) | (0.024) | (0.023) | (0.050) | (0.053) | (0.010) | (0.010) |
| Health related group | -0.149** | -0.150** | -0.184*** | -0.185*** | -0.030 | -0.030 | -0.065*** | -0.066*** |
|  | (0.045) | (0.046) | (0.028) | (0.027) | (0.068) | (0.068) | (0.016) | (0.016) |
| Financial related group | 0.095*** | 0.096*** | 0.064 | 0.064 | 0.148 | 0.151 | 0.039*** | 0.040*** |
|  | (0.021) | (0.020) | (0.035) | (0.035) | (0.080) | (0.081) | (0.011) | (0.011) |
| Received loan | 0.093 | 0.085 | 0.083 | 0.074 | 0.157 | 0.158 | 0.022 | 0.020 |
|  | (0.070) | (0.073) | (0.051) | (0.051) | (0.125) | (0.121) | (0.019) | (0.019) |
| Assistance from friends | -0.036 | -0.037 | -0.054 | -0.055 | -0.029 | -0.025 | -0.017 | -0.018 |
|  | (0.041) | (0.039) | (0.031) | (0.031) | (0.087) | (0.079) | (0.015) | (0.015) |
| Remittances | 0.098** | 0.096* | 0.008 | 0.008 | 0.183* | 0.181* | 0.004 | 0.003 |
|  | (0.041) | (0.041) | (0.042) | (0.041) | (0.084) | (0.087) | (0.019) | (0.019) |
| Social group | 0.020 | 0.020 | -0.021 | -0.019 | 0.058 | 0.053 | 0.007 | 0.005 |
|  | (0.063) | (0.066) | (0.058) | (0.058) | (0.095) | (0.095) | (0.017) | (0.017) |
| Observations | 3,105 | 3,105 | 3,105 | 3,105 | 3,105 | 3,105 | 3,105 | 3,105 |
| R-squared | 0.091 | 0.092 | 0.081 | 0.082 | 0.044 | 0.044 |  |  |
| AIC | 2761 | 2757 | 2671 | 2669 | 6307 | 6306 | 9041 | 9040 |
| BIC | 2803 | 2799 | 2714 | 2711 | 6349 | 6348 | 9168 | 9167 |
| Number of HHID | 621 | 621 | 621 | 621 | 621 | 621 | 621 | 621 |

Columns 1 -6 clustered at district level and fixed effects regression while columns 7-8 robust standard errors reported for the FE Poisson model. Columns 1 ,3, 5 & 7 are regressions with sick days used as a health measure on total, food, non-food and HDDS while columns 2, 4, 6 & 8 use hospitalization as a health measure on total, food, non-food consumptions and HDDS respectively.

**Table S4**:**Effect of health, weather shocks and their interactions on consumption (FE models)**

|  | Total consumption | | Food consumption | | Nonfood consumption | | HDDS | |
| --- | --- | --- | --- | --- | --- | --- | --- | --- |
| VARIABLES | (1) | (2) | (3) | (4) | (5) | (6) | (7) | (8) |
| Sick more than 30 days (t) | 0.018 |  | 0.043 |  | -0.100 |  | 0.025 |  |
|  | (0.039) |  | (0.032) |  | (0.066) |  | (0.016) |  |
| Sick more than 30 days (t-1) | 0.009 |  | -0.001 |  | 0.052 |  | -0.005 |  |
|  | (0.030) |  | (0.026) |  | (0.031) |  | (0.013) |  |
| Hospitalized (t) |  | 0.057** |  | 0.048** |  | 0.058 |  | 0.009 |
|  |  | (0.021) |  | (0.016) |  | (0.044) |  | (0.012) |
| Hospitalized (t-1) |  | 0.023 |  | -0.011 |  | 0.090* |  | -0.016 |
|  |  | (0.015) |  | (0.015) |  | (0.044) |  | (0.011) |
| Rainfall z scores (t) | -0.051*** | -0.052*** | -0.056*** | -0.057*** | -0.021 | -0.022 | -0.014*** | -0.014*** |
|  | (0.012) | (0.011) | (0.016) | (0.015) | (0.015) | (0.017) | (0.004) | (0.004) |
| Rainfall z scores (t-1) | -0.013 | -0.013 | -0.013 | -0.012 | 0.020 | 0.013 | 0.004 | 0.002 |
|  | (0.010) | (0.009) | (0.018) | (0.017) | (0.014) | (0.016) | (0.004) | (0.005) |
| Temperature z scores (t) | -0.125** | -0.122*** | -0.056 | -0.056 | -0.226*** | -0.224*** | 0.022 | 0.022 |
|  | (0.037) | (0.033) | (0.054) | (0.051) | (0.044) | (0.043) | (0.015) | (0.015) |
| Temperature z scores (t-1) | -0.167*** | -0.163** | -0.191** | -0.182** | -0.004 | -0.011 | -0.012 | -0.013 |
|  | (0.047) | (0.049) | (0.066) | (0.067) | (0.066) | (0.077) | (0.015) | (0.016) |
| Sick 30days# rainfall (t) | -0.034 |  | -0.034 |  | -0.026 |  | -0.012 |  |
|  | (0.032) |  | (0.029) |  | (0.049) |  | (0.011) |  |
| Sick 30days# temperature (t) | 0.017 |  | 0.021 |  | -0.104 |  | 0.000 |  |
|  | (0.057) |  | (0.055) |  | (0.086) |  | (0.020) |  |
| Sick 30days# rainfall (t-1) | -0.032 |  | -0.026 |  | -0.041* |  | -0.005 |  |
|  | (0.023) |  | (0.024) |  | (0.019) |  | (0.008) |  |
| Sick 30days# temperature (t-1) | -0.037 |  | -0.012 |  | -0.056** |  | -0.019 |  |
|  | (0.045) |  | (0.048) |  | (0.023) |  | (0.016) |  |
| Hospitalized #rainfall (t) |  | -0.012 |  | -0.024 |  | 0.018 |  | -0.007 |
|  |  | (0.035) |  | (0.027) |  | (0.066) |  | (0.008) |
| Hospitalized #temperature |  | 0.005 |  | 0.015 |  | -0.040 |  | -0.005 |
|  |  | (0.038) |  | (0.036) |  | (0.054) |  | (0.015) |
| Hospitalized #rainfall (t-1) |  | -0.015 |  | -0.024** |  | 0.020 |  | 0.011 |
|  |  | (0.009) |  | (0.009) |  | (0.040) |  | (0.008) |
| Hospitalized #temperature (t-1) |  | -0.027 |  | -0.056* |  | 0.039 |  | -0.010 |
|  |  | (0.030) |  | (0.026) |  | (0.101) |  | (0.017) |
| Household size | -0.049** | -0.049** | -0.062*** | -0.061*** | -0.031 | -0.033* | -0.002 | -0.002 |
|  | (0.020) | (0.020) | (0.014) | (0.015) | (0.018) | (0.016) | (0.004) | (0.004) |
| Assets value (log) | 0.072*** | 0.071*** | 0.040** | 0.040** | 0.119** | 0.115** | 0.014** | 0.014** |
|  | (0.017) | (0.018) | (0.015) | (0.015) | (0.034) | (0.035) | (0.006) | (0.006) |
| Livestock value (log) | 0.007*** | 0.007*** | 0.009*** | 0.009*** | 0.000 | 0.000 | 0.003*** | 0.003*** |
|  | (0.002) | (0.002) | (0.002) | (0.002) | (0.005) | (0.005) | (0.001) | (0.001) |
| Gender of assets_owner | 0.016 | 0.020 | 0.023 | 0.026 | -0.047* | -0.045* | 0.001 | 0.001 |
|  | (0.025) | (0.025) | (0.026) | (0.025) | (0.020) | (0.023) | (0.011) | (0.011) |
| Free medical services | 0.018 | 0.016 | 0.045 | 0.044 | -0.069 | -0.073 | 0.011 | 0.011 |
|  | (0.033) | (0.032) | (0.027) | (0.026) | (0.048) | (0.051) | (0.010) | (0.010) |
| Health_related_group | -0.044 | -0.046 | -0.032 | -0.031 | -0.026 | -0.038 | -0.008 | -0.009 |
|  | (0.048) | (0.049) | (0.044) | (0.044) | (0.055) | (0.053) | (0.017) | (0.017) |
| Financial_related_group | 0.106*** | 0.106*** | 0.080** | 0.079** | 0.156* | 0.157* | 0.042*** | 0.043*** |
|  | (0.020) | (0.020) | (0.031) | (0.031) | (0.076) | (0.076) | (0.010) | (0.010) |
| Received loan | 0.080 | 0.073 | 0.065 | 0.058 | 0.155 | 0.155 | 0.018 | 0.017 |
|  | (0.068) | (0.070) | (0.045) | (0.046) | (0.118) | (0.115) | (0.018) | (0.019) |
| Assistance from friends | -0.040 | -0.040 | -0.060 | -0.060 | -0.020 | -0.017 | -0.019 | -0.019 |
|  | (0.041) | (0.040) | (0.033) | (0.033) | (0.084) | (0.076) | (0.015) | (0.014) |
| Remittances | 0.105** | 0.104** | 0.028 | 0.029 | 0.169* | 0.165* | 0.010 | 0.009 |
|  | (0.037) | (0.038) | (0.037) | (0.036) | (0.077) | (0.079) | (0.019) | (0.018) |
| Social group | 0.001 | 0.001 | -0.059 | -0.057 | 0.067 | 0.063 | -0.004 | -0.006 |
|  | (0.058) | (0.060) | (0.051) | (0.049) | (0.091) | (0.094) | (0.016) | (0.016) |
| 3.wavenumber | 0.062** | 0.059** | 0.003 | 0.003 | 0.172*** | 0.169*** | -0.023** | -0.024** |
|  | (0.021) | (0.021) | (0.018) | (0.018) | (0.038) | (0.040) | (0.011) | (0.011) |
| 4.wavenumber | -0.020 | -0.018 | -0.100*** | -0.100*** | 0.056 | 0.062 | -0.027** | -0.027** |
|  | (0.024) | (0.023) | (0.028) | (0.026) | (0.058) | (0.063) | (0.012) | (0.012) |
| 5.wavenumber | -0.085* | -0.082* | -0.224*** | -0.225*** | 0.215*** | 0.232*** | -0.086*** | -0.086*** |
|  | (0.040) | (0.039) | (0.056) | (0.054) | (0.033) | (0.039) | (0.012) | (0.012) |
| 6.wavenumber | -0.166** | -0.164** | -0.237** | -0.240** | -0.022 | -0.003 | -0.098*** | -0.098*** |
|  | (0.057) | (0.056) | (0.074) | (0.072) | (0.102) | (0.111) | (0.014) | (0.015) |
| Observations | 3,105 | 3,105 | 3,105 | 3,105 | 3,105 | 3,105 | 3,105 | 3,105 |
| R-squared | 0.109 | 0.109 | 0.117 | 0.118 | 0.061 | 0.062 | - | - |
| Number of HHID | 621 | 621 | 621 | 621 | 621 | 621 | 621 | 621 |

Columns 1 -6 clustered at district level and fixed effects regression while columns 7-8 robust standard errors reported for the FE Poisson model. Columns 1 ,3, 5 & 7 are regressions with sick days used as a health measure on total, food, non-food and HDDS while columns 2, 4, 6 & 8 use hospitalization as a health measure on total, food, non-food consumptions and HDDS respectively.

**Table S5: Effect of health, extreme weather shocks and their interactions on consumption (FE models)**

| VARIABLES | Total consumption | | Food consumption | | Nonfood consumption | | | HDDS | | |
| --- | --- | --- | --- | --- | --- | --- | --- | --- | --- | --- |
|  | (1) | (2) | (3) | (4) | (5) | (6) | (7) | | (8) |
| Sick more than 30 days (t) | -0.041 |  | -0.012 |  | -0.098 |  | 0.021 | |  |
|  | (0.037) |  | (0.032) |  | (0.061) |  | (0.020) | |  |
| Sick more than 30 days (t-1) | 0.013 |  | 0.009 |  | 0.046 |  | 0.000 | |  |
|  | (0.029) |  | (0.017) |  | (0.029) |  | (0.015) | |  |
| Hospitalized (t) |  | 0.060** |  | 0.054*** |  | 0.048 |  | | 0.005 |
|  |  | (0.019) |  | (0.013) |  | (0.060) |  | | (0.014) |
| Hospitalized (t-1) |  | 0.030 |  | -0.000 |  | 0.100 |  | | -0.025** |
|  |  | (0.021) |  | (0.026) |  | (0.068) |  | | (0.013) |
| Extreme rainfall (t) | -0.129*** | -0.127*** | -0.140** | -0.133*** | -0.047 | -0.063 | -0.006 | | -0.048*** |
|  | (0.030) | (0.030) | (0.042) | (0.037) | (0.064) | (0.073) | (0.011) | | (0.013) |
| Extreme rainfall (t-1) | 0.024 | 0.018 | 0.031 | 0.025 | 0.051 | 0.041 | -0.009 | | -0.019 |
|  | (0.026) | (0.025) | (0.030) | (0.031) | (0.035) | (0.047) | (0.012) | | (0.013) |
| Extreme temperature (t) | -0.122** | -0.078* | -0.047 | -0.009 | -0.230*** | -0.228*** | -0.051*** | | -0.011 |
|  | (0.043) | (0.040) | (0.030) | (0.027) | (0.065) | (0.050) | (0.015) | | (0.016) |
| Extreme temperature (t-1) | -0.155*** | -0.162*** | -0.298*** | -0.293*** | 0.256*** | 0.270*** | -0.063*** | | -0.044** |
|  | (0.025) | (0.028) | (0.047) | (0.052) | (0.066) | (0.051) | (0.021) | | (0.022) |
| Sick 30days# rainfall (t) | 0.035 |  | 0.012 |  | 0.098 |  | 0.001 | |  |
|  | (0.074) |  | (0.069) |  | (0.085) |  | (0.028) | |  |
| Sick 30days# temperature (t) | 0.301** |  | 0.275* |  | -0.148 |  | 0.057 | |  |
|  | (0.092) |  | (0.133) |  | (0.187) |  | (0.059) | |  |
| Sick 30days# rainfall (t-1) | -0.020 |  | -0.067 |  | 0.033 |  | 0.023 | |  |
|  | (0.065) |  | (0.061) |  | (0.065) |  | (0.023) | |  |
| Sick 30days# temperature (t-1) | 0.008 |  | 0.084 |  | -0.071 |  | -0.049 | |  |
|  | (0.067) |  | (0.080) |  | (0.248) |  | (0.055) | |  |
| Hospitalized #rainfall (t) |  | -0.005 |  | -0.046 |  | 0.122 |  | | 0.013 |
|  |  | (0.067) |  | (0.066) |  | (0.137) |  | | (0.024) |
| Hospitalized #temperature (t) |  | -0.166 |  | -0.126 |  | -0.184* |  | | -0.061 |
|  |  | (0.115) |  | (0.122) |  | (0.080) |  | | (0.055) |
| Hospitalized #rainfall (t-1) |  | 0.006 |  | -0.008 |  | 0.019 |  | | 0.054** |
|  |  | (0.049) |  | (0.050) |  | (0.108) |  | | (0.022) |
| Hospitalized #temperature (t-1) |  | -0.201* |  | -0.265*** |  | -0.074 |  | | -0.051 |
|  |  | (0.094) |  | (0.060) |  | (0.066) |  | | (0.065) |
| Wave fixed effects | Yes | Yes | Yes | Yes | Yes | Yes | Yes | | Yes |
| Other variables | Yes | Yes | Yes | Yes | Yes | Yes | Yes | | Yes |
| Observations | 3,105 | 3,105 | 3,105 | 3,105 | 3,105 | 3,105 | 3,105 | | 3,105 |
| R-squared | 0.104 | 0.104 | 0.119 | 0.119 | 0.060 | 0.062 |  | |  |
| Number of HHID | 621 | 621 | 621 | 621 | 621 | 621 | 621 | | 621 |

Columns 1 -6 clustered at district level and fixed effects regression while columns 7-8 robust standard errors reported for the FE Poisson model. Columns 1 ,3, 5 & 7 are regressions with sick days used as a health measure on total, food, non-food and HDDS while columns 2, 4, 6 & 8 use hospitalization as a health measure on total, food, non-food consumptions and HDDS respectively.

**Table S6: Quantile fixed effect results on shocks and their interactions on total consumption**

|  | **Total consumption percentiles** | | | | | | | |
| --- | --- | --- | --- | --- | --- | --- | --- | --- |
| Variables | 0.2 | 0.4 | 0.6 | 0.8 | 0.2 | 0.4 | 0.6 | 0.8 |
|  | (1) | (2) | (3) | (4) | (5) | (6) | (7) | (8) |
| Sick more than 30 days (t) | -0.010 | 0.007 | 0.026 | 0.048 |  |  |  |  |
|  | (0.047) | (0.036) | (0.038) | (0.057) |  |  |  |  |
| Sick more than 30 days (t-1) | 0.048 | 0.025 | -0.002 | -0.033 |  |  |  |  |
|  | (0.039) | (0.030) | (0.032) | (0.048) |  |  |  |  |
| Hospitalized (t) |  |  |  |  | 0.052 | 0.055** | 0.058** | 0.062* |
|  |  |  |  |  | (0.033) | (0.025) | (0.025) | (0.037) |
| Hospitalized (t-1) |  |  |  |  | 0.015 | 0.020 | 0.026 | 0.032 |
|  |  |  |  |  | (0.033) | (0.025) | (0.025) | (0.037) |
| Rainfall z scores (t) | -0.050*** | -0.050*** | -0.051*** | -0.051*** | -0.048*** | -0.050*** | -0.053*** | -0.055*** |
|  | (0.012) | (0.009) | (0.010) | (0.015) | (0.013) | (0.009) | (0.010) | (0.014) |
| Rainfall z scores (t-1) | -0.024* | -0.018* | -0.010 | -0.001 | -0.021 | -0.016 | -0.011 | -0.005 |
|  | (0.014) | (0.010) | (0.011) | (0.017) | (0.014) | (0.010) | (0.011) | (0.016) |
| Temperature z scores (t) | -0.166*** | -0.142*** | -0.114*** | -0.083 | -0.157*** | -0.136*** | -0.112*** | -0.086* |
|  | (0.042) | (0.032) | (0.034) | (0.051) | (0.042) | (0.031) | (0.032) | (0.047) |
| Temperature z scores (t-1) | -0.173*** | -0.169*** | -0.165*** | -0.160*** | -0.161*** | -0.162*** | -0.164*** | -0.165*** |
|  | (0.044) | (0.033) | (0.036) | (0.054) | (0.045) | (0.034) | (0.034) | (0.051) |
| Sick 30days# rainfall (t) | -0.014 | -0.026 | -0.040 | -0.055 |  |  |  |  |
|  | (0.036) | (0.027) | (0.029) | (0.044) |  |  |  |  |
| Sick 30days# temperature (t) | 0.049 | 0.030 | 0.008 | -0.017 |  |  |  |  |
|  | (0.060) | (0.045) | (0.049) | (0.073) |  |  |  |  |
| Sick 30days# rainfall (t-1) | -0.030 | -0.031 | -0.032 | -0.034 |  |  |  |  |
|  | (0.033) | (0.025) | (0.026) | (0.040) |  |  |  |  |
| Sick 30days# temperature (t-1) | 0.001 | -0.022 | -0.048 | -0.078 |  |  |  |  |
|  | (0.056) | (0.042) | (0.045) | (0.068) |  |  |  |  |
| Hospitalized #rainfall (t) |  |  |  |  | -0.031 | -0.019 | -0.006 | 0.008 |
|  |  |  |  |  | (0.026) | (0.019) | (0.020) | (0.029) |
| Hospitalized #temperature (t) |  |  |  |  | -0.007 | 0.000 | 0.009 | 0.018 |
|  |  |  |  |  | (0.044) | (0.033) | (0.033) | (0.049) |
| Hospitalized #rainfall (t-1) |  |  |  |  | -0.019 | -0.016 | -0.014 | -0.011 |
|  |  |  |  |  | (0.025) | (0.018) | (0.019) | (0.028) |
| Hospitalized #temperature (t-1) |  |  |  |  | -0.052 | -0.037 | -0.020 | -0.001 |
|  |  |  |  |  | (0.044) | (0.033) | (0.034) | (0.050) |
| Household size | -0.057*** | -0.053*** | -0.047*** | -0.041** | -0.057*** | -0.052*** | -0.047*** | -0.041** |
|  | (0.014) | (0.011) | (0.012) | (0.017) | (0.014) | (0.011) | (0.011) | (0.016) |
| Assets value (log) | 0.058** | 0.066*** | 0.077*** | 0.088*** | 0.056*** | 0.065*** | 0.075*** | 0.086*** |
|  | (0.018) | (0.014) | (0.015) | (0.022) | (0.018) | (0.014) | (0.014) | (0.021) |
| Livestock value (log) | 0.008*** | 0.007*** | 0.007*** | 0.006 | 0.008*** | 0.008*** | 0.007*** | 0.006* |
|  | (0.003) | (0.002) | (0.002) | (0.004) | (0.003) | (0.002) | (0.002) | (0.003) |
| Gender of assets_owner | 0.014 | 0.015 | 0.017 | 0.019 | 0.017 | 0.018 | 0.020 | 0.023 |
|  | (0.034) | (0.026) | (0.027) | (0.041) | (0.034) | (0.025) | (0.026) | (0.038) |
| Free medical services | 0.011 | 0.015 | 0.020 | 0.025 | 0.008 | 0.012 | 0.018 | 0.024 |
|  | (0.033) | (0.025) | (0.026) | (0.040) | (0.033) | (0.025) | (0.025) | (0.037) |
| Health_related_group | -0.047 | -0.045 | -0.043 | -0.040 | -0.045 | -0.046 | -0.047 | -0.047 |
|  | (0.049) | (0.037) | (0.040) | (0.060) | (0.050) | (0.037) | (0.038) | (0.056) |
| Financial_related_group | 0.101*** | 0.104*** | 0.107*** | 0.111*** | 0.099*** | 0.103*** | 0.108*** | 0.113*** |
|  | (0.032) | (0.024) | (0.026) | (0.038) | (0.032) | 0.024 | (0.024) | (0.036) |
| Received loan | 0.096 | 0.086* | 0.075 | 0.063 | 0.084 | 0.078* | 0.070 | 0.062 |
|  | (0.060) | (0.045) | (0.048) | (0.073) | (0.061) | (0.046) | (0.047) | (0.069) |
| Assistance from friends | -0.015 | -0.030 | -0.046 | -0.065 | -0.014 | -0.030 | -0.047 | -0.067 |
|  | (0.044) | (0.033) | (0.036) | (0.054) | (0.044) | (0.033) | (0.033) | (0.049) |
| Remittances | 0.078 | 0.094** | 0.113** | 0.135* | 0.080 | 0.094** | 0.111** | 0.129* |
|  | (0.062) | (0.047) | (0.050) | (0.075) | (0.062) | (0.046) | (0.047) | (0.070) |
| Social group | 0.022 | 0.010 | -0.005 | -0.021 | 0.021 | 0.009 | -0.004 | -0.019 |
|  | (0.067) | (0.050) | (0.054) | (0.081) | (0.067) | (0.050) | (0.051) | (0.075) |
| Wave 2 | 0.085** | 0.133*** | 0.190*** | 0.252*** | 0.090*** | 0.134*** | 0.185*** | 0.243*** |
|  | (0.034) | (0.026) | (0.027) | (0.041) | (0.034) | (0.025) | (0.026) | (0.038) |
| Wave 3 | 0.215*** | 0.223*** | 0.232*** | 0.243*** | 0.212*** | 0.219*** | 0.227*** | 0.236*** |
|  | (0.000) | (0.000) | (0.000) | (0.000) | (0.000) | (0.000) | (0.000) | (0.000) |
| Wave 4 | 0.118*** | 0.135*** | 0.154*** | 0.176*** | 0.116*** | 0.134*** | 0.154*** | 0.177*** |
|  | (0.031) | (0.024) | (0.025) | (0.038) | (0.032) | (0.024) | (0.024) | (0.036) |
| Wave 5 | 0.053 | 0.070*** | 0.090*** | 0.112*** | 0.054 | 0.071*** | 0.091*** | 0.112*** |
|  | (0.035) | (0.027) | (0.029) | (0.043) | (0.036) | (0.027) | (0.027) | (0.040) |
| Wave 6 | 0.000 | 0.000 | 0.000 | 0.000 | 0.000 | 0.000 | 0.000 | 0.000 |
|  | (0.041) | (0.031) | (0.033) | (0.050) | (0.041) | (0.031) | (0.032) | (0.047) |

Standard errors in parentheses *** p<0.01, ** p<0.05, * p<0.1. Columns 1-4 is quantile regressions using a health variable “if household member was sick more than 30 days while hospitalization health measure was used in columns 5-8

**Table S7: Quantile fixed effect results on shocks and their interactions on food consumption**

|  | Food consumption percentiles | | | | | | | |
| --- | --- | --- | --- | --- | --- | --- | --- | --- |
| Variables | 0.2 | 0.4 | 0.6 | 0.8 | 0.2 | 0.4 | 0.6 | 0.8 |
|  | (1) | (2) | (3) | (4) | (5) | (6) | (7) | (8) |
| Sick more than 30 days (t) | 0.011 | 0.031 | 0.053 | 0.076 |  |  |  |  |
|  | (0.049) | (0.036) | (0.037) | (0.052) |  |  |  |  |
| Sick more than 30 days (t-1) | 0.042 | 0.015 | -0.015 | -0.045 |  |  |  |  |
|  | (0.042) | (0.031) | (0.032) | (0.045) |  |  |  |  |
| Hospitalized (t) |  |  |  |  | 0.047 | 0.048* | 0.048* | 0.049 |
|  |  |  |  |  | (0.034) | (0.025) | (0.026) | (0.037) |
| Hospitalized (t-1) |  |  |  |  | -0.019 | -0.014 | -0.008 | -0.002 |
|  |  |  |  |  | (0.034) | (0.025) | (0.026) | (0.037) |
| Rainfall z scores (t) | -0.058*** | -0.057*** | -0.056*** | -0.055*** | -0.056*** | -0.057*** | -0.057*** | -0.058*** |
|  | (0.013) | (0.009) | (0.010) | (0.014) | (0.013) | (0.009) | (0.010) | (0.014) |
| Rainfall z scores (t-1) | -0.022 | -0.017 | -0.010 | -0.004 | -0.017 | -0.013 | -0.010 | -0.006 |
|  | (0.014) | (0.010) | (0.010) | (0.015) | (0.014) | (0.010) | (0.010) | (0.015) |
| Temperature z scores (t) | -0.074* | -0.063** | -0.050 | -0.037 | -0.073* | -0.062** | -0.050 | -0.038 |
|  | (0.042) | (0.031) | (0.032) | (0.046) | (0.042) | (0.031) | (0.032) | (0.045) |
| Temperature z scores (t-1) | -0.192*** | -0.191*** | -0.191*** | -0.191*** | -0.174*** | -0.179*** | -0.184*** | -0.190*** |
|  | (0.045) | (0.033) | (0.034) | (0.048) | (0.044) | (0.033) | (0.034) | (0.048) |
| Sick 30days# rainfall (t) | -0.011 | -0.025 | -0.042 | -0.058 |  |  |  |  |
|  | (0.034) | (0.025) | (0.025) | (0.036) |  |  |  |  |
| Sick 30days# temperature (t) | 0.036 | 0.027 | 0.016 | 0.005 |  |  |  |  |
|  | (0.060) | (0.044) | (0.045) | (0.065) |  |  |  |  |
| Sick 30days# rainfall (t-1) | -0.013 | -0.021 | -0.030 | -0.038 |  |  |  |  |
|  | (0.031) | (0.023) | (0.024) | (0.034) |  |  |  |  |
| Sick 30days# temperature (t-1) | 0.010 | -0.004 | -0.020 | -0.036 |  |  |  |  |
|  | (0.056) | (0.042) | (0.042) | (0.061) |  |  |  |  |
| Hospitalized #rainfall (t) |  |  |  |  | -0.032 | -0.027 | -0.021 | -0.016 |
|  |  |  |  |  | (0.026) | (0.019) | (0.020) | (0.028) |
| Hospitalized #temperature (t) |  |  |  |  | 0.020 | 0.017 | 0.013 | 0.009 |
|  |  |  |  |  | (0.045) | (0.033) | (0.034) | (0.049) |
| Hospitalized #rainfall (t-1) |  |  |  |  | -0.033 | -0.028 | -0.022 | -0.015 |
|  |  |  |  |  | (0.026) | (0.019) | (0.019) | (0.028) |
| Hospitalized #temperature (t-1) |  |  |  |  | -0.067 | -0.060* | -0.052 | -0.045 |
|  |  |  |  |  | (0.047) | (0.035) | (0.035) | (0.051) |
| Household size | -0.072*** | -0.066*** | -0.058*** | -0.051*** | -0.071*** | -0.065*** | -0.057*** | -0.050*** |
|  | (0.015) | (0.011) | (0.011) | (0.016) | (0.014) | (0.011) | (0.011) | (0.016) |
| Assets value (log) | 0.046*** | 0.043*** | 0.038*** | 0.034* | 0.047*** | 0.042*** | 0.037*** | 0.032* |
|  | (0.018) | (0.013) | (0.014) | (0.019) | (0.018) | (0.013) | (0.013) | (0.019) |
| Livestock value (log) | 0.009*** | 0.009*** | 0.009*** | 0.009** | 0.009*** | 0.009*** | 0.009*** | 0.009** |
|  | (0.003) | (0.002) | (0.002) | (0.004) | (0.003) | (0.002) | (0.002) | (0.003) |
| Gender of assets_owner | 0.006 | 0.017 | 0.029 | 0.041 | 0.008 | 0.019 | 0.032 | 0.045 |
|  | (0.035) | (0.026) | (0.026) | (0.037) | (0.034) | (0.025) | (0.026) | (0.037) |
| Free medical services | 0.048 | 0.046* | 0.045* | 0.043 | 0.045 | 0.044* | 0.044* | 0.043 |
|  | (0.034) | (0.025) | (0.025) | (0.036) | (0.033) | (0.024) | (0.025) | (0.036) |
| Health_related_group | -0.043 | -0.036 | -0.029 | -0.021 | -0.036 | -0.033 | -0.030 | -0.026 |
|  | (0.050) | (0.037) | (0.037) | (0.054) | (0.049) | (0.036) | (0.037) | (0.053) |
| Financial_related_group | 0.093*** | 0.085*** | 0.075*** | 0.066* | 0.088*** | 0.082*** | 0.076*** | 0.070* |
|  | (0.034) | (0.025) | (0.025) | (0.036) | (0.033) | (0.024) | (0.025) | (0.036) |
| Received loan | 0.079 | 0.070 | 0.060 | 0.050 | 0.065 | 0.060 | 0.056 | 0.051 |
|  | (0.060) | (0.044) | (0.045) | (0.064) | (0.060) | (0.044) | (0.045) | (0.065) |
| Assistance from friends | -0.038 | -0.052 | -0.067** | -0.083* | -0.037 | -0.051 | -0.067** | -0.083* |
|  | (0.045) | (0.034) | (0.034) | (0.049) | (0.044) | (0.033) | (0.034) | (0.048) |
| Remittances | 0.030 | 0.029 | 0.027 | 0.025 | 0.035 | 0.031 | 0.027 | 0.023 |
|  | (0.059) | (0.043) | (0.044) | (0.063) | (0.058) | (0.043) | (0.044) | (0.063) |
| Social group | -0.009 | -0.040 | -0.076 | -0.111* | -0.003 | -0.036 | -0.074 | -0.112* |
|  | (0.062) | (0.046) | (0.046) | (0.066) | (0.060) | (0.045) | (0.046) | (0.066) |
| Wave 2 | 0.186*** | 0.218*** | 0.255*** | 0.291*** | 0.194*** | 0.223*** | 0.255*** | 0.288*** |
|  | (0.034) | (0.025) | (0.026) | (0.037) | (0.033) | (0.025) | (0.025) | (0.036) |
| Wave 3 | 0.251*** | 0.244*** | 0.237*** | 0.229*** | 0.259*** | 0.249*** | 0.238*** | 0.226*** |
|  | (0.000) | (0.000) | (0.000) | (0.000) | (0.000) | (0.000) | (0.000) | (0.000) |
| Wave 4 | 0.126*** | 0.133*** | 0.141*** | 0.149*** | 0.130*** | 0.136*** | 0.144*** | 0.151*** |
|  | (0.033) | (0.024) | (0.024) | (0.035) | (0.032) | (0.024) | (0.024) | (0.035) |
| Wave 5 | 0.014 | 0.013 | 0.013 | 0.012 | 0.017 | 0.016 | 0.014 | 0.013 |
|  | (0.036) | (0.026) | (0.027) | (0.038) | (0.035) | (0.026) | (0.027) | (0.038) |
| Wave 6 | 0.000 | 0.000 | 0.000 | 0.000 | 0.000 | 0.000 | 0.000 | 0.000 |
|  | (0.043) | (0.031) | (0.032) | (0.046) | (0.042) | (0.031) | (0.032) | (0.045) |

Standard errors in parentheses *** p<0.01, ** p<0.05, * p<0.1. Columns 1-4 is quantile regressions using a health variable “if household member was sick more than 30 days while hospitalization health measure was used in columns 5-8

**Table S8: Quantile fixed effect results on shocks and their interactions on nonfood consumption**

|  | Non-food percentile | | | | | | | |
| --- | --- | --- | --- | --- | --- | --- | --- | --- |
| Variables | 0.2 | 0.4 | 0.6 | 0.8 | 0.2 | 0.4 | 0.6 | 0.8 |
|  | (1) | (2) | (3) | (4) | (5) | (6) | (7) | (8) |
| Sick more than 30 days (t) | -0.122 | -0.108* | -0.092 | -0.076 |  |  |  |  |
|  | (0.083) | (0.062) | (0.062) | (0.088) |  |  |  |  |
| Sick more than 30 days (t-1) | 0.079 | 0.062 | 0.043 | 0.024 |  |  |  |  |
|  | (0.071) | (0.053) | (0.053) | (0.076) |  |  |  |  |
| Hospitalized (t) |  |  |  |  | -0.001 | 0.035 | 0.077 | 0.119* |
|  |  |  |  |  | (0.069) | (0.051) | (0.049) | (0.069) |
| Hospitalized (t-1) |  |  |  |  | 0.142** | 0.110** | 0.073* | 0.035 |
|  |  |  |  |  | (0.063) | (0.046) | (0.044) | (0.063) |
| Rainfall z scores (t) | -0.016 | -0.019 | -0.022 | -0.025 | -0.013 | -0.019 | -0.025 | -0.031 |
|  | (0.023) | (0.017) | (0.017) | (0.024) | (0.025) | (0.018) | (0.018) | (0.025) |
| Rainfall z scores (t-1) | 0.026 | 0.023 | 0.018 | 0.014 | 0.022 | 0.017 | 0.011 | 0.005 |
|  | (0.024) | (0.018) | (0.018) | (0.026) | (0.027) | (0.020) | (0.019) | (0.027) |
| Temperature z scores (t) | -0.278*** | -0.246*** | -0.209*** | -0.171** | -0.260*** | -0.238*** | -0.213*** | -0.187** |
|  | (0.076) | (.057) | (0.057) | (0.081) | (0.083) | (0.061) | (0.059) | (0.083) |
| Temperature z scores (t-1) | -0.009 | -0.006 | -0.002 | 0.002 | 0.000 | -0.007 | -0.015 | -0.022 |
|  | (0.081) | (0.061) | (0.061) | (0.086) | (0.089) | (0.066) | (0.063) | (0.089) |
| Sick 30days# rainfall (t) | -0.017 | -0.022 | -0.029 | -0.036 |  |  |  |  |
|  | (0.065) | (0.048) | (0.048) | (0.069) |  |  |  |  |
| Sick 30days# temperature (t) | -0.106 | -0.105 | -0.103 | -0.102 |  |  |  |  |
|  | (0.113) | (0.084) | (0.084) | (0.120) |  |  |  |  |
| Sick 30days# rainfall (t-1) | -0.045 | -0.042 | -0.040 | -0.037 |  |  |  |  |
|  | (0.062) | (0.046) | (0.046) | (0.065) |  |  |  |  |
| Sick 30days# temperature (t-1) | -0.034 | -0.047 | -0.063 | -0.079 |  |  |  |  |
|  | (0.109) | (0.081) | (0.081) | (0.115) |  |  |  |  |
| Hospitalized #rainfall (t) |  |  |  |  | -0.008 | 0.008 | 0.027 | 0.046 |
|  |  |  |  |  | (0.053) | (0.039) | (0.038) | (0.053) |
| Hospitalized #temperature (t) |  |  |  |  | -0.140 | -0.080 | -0.009 | 0.064 |
|  |  |  |  |  | (0.089) | (0.066) | (0.063) | (0.089) |
| Hospitalized #rainfall (t-1) |  |  |  |  | 0.026 | 0.022 | 0.018 | 0.014 |
|  |  |  |  |  | (0.050) | (0.037) | (0.035) | (0.050) |
| Hospitalized #temperature (t-1) |  |  |  |  | 0.008 | 0.027 | 0.048 | 0.070 |
|  |  |  |  |  | (0.089) | (0.066) | (0.063) | (0.089) |
| Household size | -0.050** | -0.038** | -0.025 | -0.011 | -0.050* | -0.040* | -0.028 | -0.016 |
|  | (0.025) | (0.019) | (0.019) | (0.027) | (0.027) | (0.020) | (0.019) | (0.027) |
| Assets value (log) | 0.103*** | 0.112*** | 0.124*** | 0.135*** | 0.099*** | 0.109*** | 0.120*** | 0.132*** |
|  | (0.034) | (0.025) | (0.025) | (0.036) | (0.036) | (0.027) | (0.026) | (0.036) |
| Livestock value (log) | -0.001 | 0.000 | 0.000 | 0.001 | 0.000 | 0.000 | 0.001 | 0.001 |
|  | (0.006) | (0.004) | (0.004) | (0.006) | (0.006) | (0.004) | (0.004) | (0.006) |
| Gender of assets_owner | -0.048 | -0.048 | -0.047 | -0.046 | -0.049 | -0.047 | -0.044 | -0.041 |
|  | (0.063) | (0.047) | (0.047) | (0.066) | (0.068) | (0.050) | (0.048) | (0.068) |
| Free medical services | -0.107* | -0.084* | -0.057 | -0.030 | -0.105 | -0.085* | -0.063 | -0.040 |
|  | (0.061) | (0.046) | (0.046) | (0.065) | (0.067) | (0.049) | (0.047) | (0.067) |
| Health_related_group | 0.016 | -0.010 | -0.039 | -0.069 | 0.015 | -0.017 | -0.055 | -0.094 |
|  | (0.091) | (0.068) | (0.068) | (0.096) | (0.098) | (0.073) | (0.070) | (0.098) |
| Financial_related_group | 0.114** | 0.139*** | 0.169*** | 0.200*** | 0.118* | 0.142*** | 0.169*** | 0.198*** |
|  | (0.057) | (0.043) | (0.043) | (0.061) | (0.062) | (0.046) | (0.044) | (0.062) |
| Received loan | 0.209** | 0.176** | 0.137* | 0.097 | 0.214* | 0.178** | 0.136* | 0.093 |
|  | (0.103) | (0.077) | (0.077) | (0.110) | (0.114) | (0.084) | (0.081) | (0.114) |
| Assistance from friends | -0.036 | -0.026 | -0.014 | -0.003 | -0.043 | -0.027 | -0.009 | 0.009 |
|  | (0.079) | (0.059) | (0.059) | (0.084) | (0.086) | (0.063) | (0.061) | (0.086) |
| Remittances | 0.086 | 0.137* | 0.196** | 0.255** | 0.085 | 0.133 | 0.190** | 0.248** |
|  | (0.110) | (0.082) | (0.082) | (0.117) | (0.120) | (0.089) | (0.085) | (0.120) |
| Social group | 0.052 | 0.061 | 0.072 | 0.082 | 0.039 | 0.054 | 0.071 | 0.089 |
|  | (0.117) | (0.087) | (0.087) | (0.124) | (0.126) | (0.093) | (0.089) | (0.126) |
| Wave 2 | -0.058 | -0.009 | 0.048 | 0.105 | -0.067 | -0.024 | 0.026 | 0.077 |
|  | (0.063) | (0.047) | (0.047) | (0.066) | (0.068) | (0.050) | (0.048) | (0.068) |
| Wave 3 | 0.156*** | 0.179*** | 0.206*** | 0.233*** | 0.139*** | 0.159*** | 0.183*** | 0.207*** |
|  | (0.001) | (0.001) | (0.001) | (0.001) | (0.001) | (0.001) | (0.001) | (0.001) |
| Wave 4 | 0.028 | 0.058 | 0.094** | 0.130** | 0.008 | 0.043 | 0.084* | 0.126** |
|  | (0.059) | (0.044) | (0.044) | (0.062) | (0.063) | (0.047) | (0.045) | (0.063) |
| Wave 5 | 0.252*** | 0.243*** | 0.232*** | 0.221*** | 0.250*** | 0.241*** | 0.230*** | 0.219*** |
|  | (0.064) | (0.048) | (0.048) | (0.068) | (0.069) | (0.051) | (0.049) | (0.070) |
| Wave 6 | 0.000 | 0.000 | 0.000 | 0.000 | 0.000 | 0.000 | 0.000 | 0.000 |
|  | (0.079) | (0.059) | (0.059) | (0.083) | (0.085) | (0.063) | (0.060) | (0.085) |
|  |  |  |  |  |  |  |  |  |

Standard errors in parentheses *** p<0.01, ** p<0.05, * p<0.1. Columns 1-4 is quantile regressions using a health variable “if household member was sick more than 30 days while hospitalization health measure was used in columns 5-8

**Table S9: Effect of illness and weather on health costs, wage income and family labour**

| VARIABLES | Health expenditures (0000 UGX) | | Labour income (0000 UGX) | | Family Agric labour (person days) | |
| --- | --- | --- | --- | --- | --- | --- |
|  | (1) | (2) | (3) | (4) | (5) | (6) |
| Sick more than 30 days (t) | 16.716*** |  | -4.151 |  | -10.857 |  |
|  | (0.967) |  | (5.660) |  | (5.839) |  |
| Sick more than 30 days (t-1) | 3.311*** |  | 1.124 |  | 4.487 |  |
|  | (0.967) |  | (5.434) |  | (3.499) |  |
| Hospitalized (t) |  | 15.913*** |  | 5.489 |  | 0.373 |
|  |  | (0.748) |  | (4.506) |  | (1.900) |
| Hospitalized (t-1) |  | 2.149*** |  | -3.953 |  | -3.016 |
|  |  | (0.773) |  | (4.545) |  | (1.773) |
| Rainfall z scores (t) | 1.074*** | 1.160*** | -0.900 | -1.141 | -1.074 | -0.993 |
|  | (0.271) | (0.272) | (1.403) | (1.432) | (2.205) | (2.126) |
| Rainfall z scores (t-1) | 1.045*** | 0.845*** | 2.773* | 2.951** | -2.412 | -2.194 |
|  | (0.280) | (0.282) | (1.467) | (1.501) | (1.338) | (1.345) |
| Temperature z scores (t) | 1.747** | 1.470* | -7.272* | -6.333 | -12.497* | -13.593* |
|  | (0.784) | (0.770) | (4.158) | (4.180) | (6.338) | (6.650) |
| Temperature z scores (t-1) | -0.392 | -0.199 | -3.417 | -3.876 | 2.149 | 2.714 |
|  | (0.816) | (0.804) | (4.300) | (4.339) | (2.711) | (2.651) |
| Sick 30days# rainfall (t) | -1.514** |  | -2.228 |  | -0.856 |  |
|  | (0.742) |  | (4.388) |  | (2.676) |  |
| Sick 30days# temperature (t) | 0.122 |  | 12.335* |  | -8.210 |  |
|  | (1.234) |  | (7.383) |  | (4.549) |  |
| Sick 30days# rainfall (t-1) | -1.696** |  | 1.980 |  | 0.900 |  |
|  | (0.776) |  | (4.376) |  | (2.157) |  |
| Sick 30days# temperature (t-1) | 0.166 |  | 4.081 |  | -0.671 |  |
|  | (1.316) |  | (7.303) |  | (2.820) |  |
| Hospitalized #rainfall (t) |  | -1.207** |  | -0.602 |  | -0.809 |
|  |  | (0.534) |  | (3.096) |  | (1.496) |
| Hospitalized #temperature (t) |  | 0.096 |  | -0.555 |  | 2.379 |
|  |  | (0.960) |  | (5.671) |  | (1.929) |
| Hospitalized #rainfall (t-1) |  | -0.830 |  | 1.349 |  | -0.998 |
|  |  | (0.571) |  | (3.299) |  | (0.826) |
| Hospitalized #temperature (t-1) |  | -2.226** |  | 6.188 |  | -1.834 |
|  |  | (1.078) |  | (6.117) |  | (1.519) |
| Household size | 0.502*** | 0.511*** | 2.014** | 2.035** | 1.421 | 1.243 |
|  | (0.144) | (0.140) | (0.860) | (0.861) | (1.082) | (0.959) |
| Assets value (log) | 2.372*** | 2.223*** | 12.530*** | 12.408*** | 1.537 | 1.245 |
|  | (0.271) | (0.265) | (1.560) | (1.564) | (1.172) | (1.021) |
| Livestock value (log) | -0.102 | -0.045 | 0.410 | 0.419 | -0.148 | -0.152 |
|  | (0.066) | (0.065) | (0.367) | (0.367) | (0.109) | (0.102) |
| Gender of assets_owner | -2.350*** | -1.547** | -5.059 | -5.045 | 0.659 | 0.554 |
|  | (0.684) | (0.668) | (3.801) | (3.801) | (2.826) | (2.805) |
| Free medical services | -2.200*** | -2.112*** | -7.899* | -8.716** | 3.245 | 2.853 |
|  | (0.748) | (0.731) | (4.052) | (4.058) | (2.443) | (2.717) |
| Health_related_group | -1.966** | -2.575*** | 10.333** | 9.714** | -8.441* | -8.625** |
|  | (0.869) | (0.851) | (4.660) | (4.670) | (3.692) | (3.619) |
| Financial_related_group | 1.988*** | 1.961*** | 16.910*** | 16.974*** | 4.783** | 4.599* |
|  | (0.665) | (0.654) | (3.676) | (3.685) | (1.941) | (2.061) |
| Received loan | 2.360* | 0.564 | -0.292 | -1.544 | 0.997 | 0.902 |
|  | (1.397) | (1.374) | (7.754) | (7.761) | (3.595) | (3.546) |
| Assistance from friends | 2.871*** | 3.370*** | -2.687 | -3.623 | -2.256 | -1.851 |
|  | (1.025) | (0.997) | (5.839) | (5.829) | (1.364) | (1.561) |
| Remittances | 3.203** | 2.009 | -16.896** | -17.162** | 7.895 | 8.045 |
|  | (1.285) | (1.261) | (7.474) | (7.482) | (6.890) | (6.838) |
| Social group | -3.375** | -2.922** | -32.028*** | -32.391*** | 11.718 | 11.928 |
|  | (1.502) | (1.467) | (8.772) | (8.797) | (12.959) | (13.088) |
| Wave 3 | -2.031** | -1.844** | -16.981*** | -17.099*** | 26.521* | 27.250* |
|  | (0.841) | (0.820) | (4.560) | (4.554) | (11.312) | (11.599) |
| Wave 4 | -3.053*** | -2.558*** | -14.644*** | -13.644*** | 7.602** | 8.143** |
|  | (0.896) | (0.879) | (4.770) | (4.784) | (2.470) | (2.583) |
| Wave 5 | -2.961*** | -2.192** | -5.178 | -4.166 | 44.559*** | 45.090*** |
|  | (0.904) | (0.886) | (4.708) | (4.721) | (10.681) | (11.070) |
| Wave 6 | -2.167** | -1.551* | -15.271*** | -14.652*** | 9.047 | 9.654 |
|  | (0.952) | (0.932) | (5.068) | (5.072) | (7.477) | (7.388) |
|  | (3.757) | (3.673) | (21.669) | (21.708) | (25.943) | (23.266) |
| Observations | 3,105 | 3,105 | 3,105 | 3,105 | 3,105 | 3,105 |
| Number of HHID | 621 | 621 | 621 | 621 | 621 | 621 |

Standard errors in parentheses, *** p<0.01, ** p<0.05, * p<0.1. Columns 1, 3 & 5 uses a health variable “if household member was sick more than 30 days on health expenditures, labor income and agriculture family labor respectively while hospitalization health measure was used in columns 2, 4 & 6

**Figure S1**: CHIRPS Rainfall data for all sampled households (A), across districts (B and C)

*NB: Both annual and monthly mean range from (1990-2020)*
